# Supplementary material for: Site-Specific Variability in the Chemical Diversity of the Antarctic Red Alga Plocamium cartilagineum
Source: MDPI journal article supplement (doi:10.3390/md11062126), 2013-06-14
Supplement: s2 [file s2]

marinedrugs-11-02126-s001.mol
  corina  04141423423D 1   1.00000     0.00000 
CORINA 3.49 0023  12.04.2013
 15 14  0  0  0  0  0  0  0  0999 V2000
    0.0021   -0.0041    0.0020 Br  0  0  0  0  0  0  0  0  0  0  0  0
   -0.0246    1.9617    0.0128 C   0  0  0  0  0  0  0  0  0  0  0  0
    1.4108    2.4913    0.0020 C   0  0  0  0  0  0  0  0  0  0  0  0
    2.1508    1.9845    1.2415 C   0  0  0  0  0  0  0  0  0  0  0  0
    3.6187    2.4096    1.1685 C   0  0  0  0  0  0  0  0  0  0  0  0
    4.3299    2.0119    2.4635 C   0  0  0  0  0  0  0  0  0  0  0  0
    5.7757    2.4307    2.3916 C   0  0  0  0  0  0  0  0  0  0  0  0
    6.2597    3.2708    3.2744 C   0  0  0  0  0  0  0  0  0  0  0  0
    8.0740    3.7962    3.1842 Br  0  0  0  0  0  0  0  0  0  0  0  0
    3.5361    2.8298    3.8606 Cl  0  0  0  0  0  0  0  0  0  0  0  0
    4.2466    0.4951    2.6460 C   0  0  0  0  0  0  0  0  0  0  0  0
    4.4843    1.5178   -0.3549 Br  0  0  0  0  0  0  0  0  0  0  0  0
    1.3863    4.2941    0.0119 Cl  0  0  0  0  0  0  0  0  0  0  0  0
   -0.7646    2.4686   -1.2267 C   0  0  0  0  0  0  0  0  0  0  0  0
   -0.7407    2.4551    1.2716 C   0  0  0  0  0  0  0  0  0  0  0  0
  1  2  1  0      
  2  3  1  0      
  3  4  1  0      
  4  5  1  0      
  5  6  1  0      
  6  7  1  0      
  7  8  2  0      
  8  9  1  0      
  6 10  1  0      
  6 11  1  0      
  5 12  1  0      
  3 13  1  0      
  2 14  1  0      
  2 15  1  0      
M  END
$$$$
