# Supplementary material for: Site-Specific Variability in the Chemical Diversity of the Antarctic Red Alga Plocamium cartilagineum
Source: MDPI journal article supplement (doi:10.3390/md11062126), 2013-06-14
Supplement: s3 [file s3]

marinedrugs-11-02126-s001.mol
  ChemDraw02071408432D

 15 14  0  0  0  0  0  0  0  0999 V2000
   -2.8579   -0.1510    0.0000 Br  0  0  0  0  0  0  0  0  0  0  0  0
   -2.1434    0.2615    0.0000 C   0  0  0  0  0  0  0  0  0  0  0  0
   -1.4289   -0.1510    0.0000 C   0  0  0  0  0  0  0  0  0  0  0  0
   -0.7145    0.2615    0.0000 C   0  0  0  0  0  0  0  0  0  0  0  0
   -0.0000   -0.1510    0.0000 C   0  0  0  0  0  0  0  0  0  0  0  0
    0.7145    0.2615    0.0000 C   0  0  0  0  0  0  0  0  0  0  0  0
    1.4289   -0.1510    0.0000 C   0  0  0  0  0  0  0  0  0  0  0  0
    2.1434    0.2615    0.0000 C   0  0  0  0  0  0  0  0  0  0  0  0
    2.8579   -0.1510    0.0000 Br  0  0  0  0  0  0  0  0  0  0  0  0
    1.2978    0.8449    0.0000 Cl  0  0  0  0  0  0  0  0  0  0  0  0
    0.1311    0.8449    0.0000 C   0  0  0  0  0  0  0  0  0  0  0  0
   -0.0000   -0.9760    0.0000 Br  0  0  0  0  0  0  0  0  0  0  0  0
   -1.4289   -0.9760    0.0000 Cl  0  0  0  0  0  0  0  0  0  0  0  0
   -1.7309    0.9760    0.0000 C   0  0  0  0  0  0  0  0  0  0  0  0
   -2.5559    0.9760    0.0000 C   0  0  0  0  0  0  0  0  0  0  0  0
  1  2  1  0      
  2  3  1  0      
  3  4  1  0      
  4  5  1  0      
  5  6  1  0      
  6  7  1  0      
  7  8  2  0      
  8  9  1  0      
  6 10  1  6      
  6 11  1  1      
  5 12  1  1      
  3 13  1  6      
  2 14  1  0      
  2 15  1  0      
M  END
