# Supplementary material for: Site-Specific Variability in the Chemical Diversity of the Antarctic Red Alga Plocamium cartilagineum
Source: MDPI journal article supplement (doi:10.3390/md11062126), 2013-06-14
Supplement: s4 [file s4]

marinedrugs-11-02126-s002.mol
  corina  04141423423D 1   1.00000     0.00000 
CORINA 3.49 0023  12.04.2013
 13 13  0  0  0  0  0  0  0  0999 V2000
   -0.0184    1.5085    0.0103 C   0  0  0  0  0  0  0  0  0  0  0  0
    0.0021   -0.0041    0.0020 C   0  0  0  0  0  0  0  0  0  0  0  0
    0.9268   -0.4849    1.1252 C   0  0  0  0  0  0  0  0  0  0  0  0
    2.3021    0.1650    0.9644 C   0  0  0  0  0  0  0  0  0  0  0  0
    2.1811    1.6813    1.1249 C   0  0  0  0  0  0  0  0  0  0  0  0
    1.3035    2.2437    0.0017 C   0  0  0  0  0  0  0  0  0  0  0  0
    3.5509    2.3053    1.0527 C   0  0  0  0  0  0  0  0  0  0  0  0
    3.8219    3.1864    0.1197 C   0  0  0  0  0  0  0  0  0  0  0  0
    5.3999    3.9052    0.0366 Cl  0  0  0  0  0  0  0  0  0  0  0  0
   -1.1521    2.1649    0.0193 C   0  0  0  0  0  0  0  0  0  0  0  0
    1.5446    2.0020    2.4788 C   0  0  0  0  0  0  0  0  0  0  0  0
   -1.6646   -0.6338    0.2784 Cl  0  0  0  0  0  0  0  0  0  0  0  0
    2.9564   -0.2141   -0.6723 Cl  0  0  0  0  0  0  0  0  0  0  0  0
  1  2  1  0      
  2  3  1  0      
  3  4  1  0      
  4  5  1  0      
  5  6  1  0      
  6  1  1  0      
  5  7  1  0      
  7  8  2  0      
  8  9  1  0      
  1 10  2  0      
  5 11  1  0      
  2 12  1  0      
  4 13  1  0      
M  END
$$$$
