# Supplementary material for: Site-Specific Variability in the Chemical Diversity of the Antarctic Red Alga Plocamium cartilagineum
Source: MDPI journal article supplement (doi:10.3390/md11062126), 2013-06-14
Supplement: s5 [file s5]

marinedrugs-11-02126-s002.mol
  ChemDraw02071408442D

 13 13  0  0  0  0  0  0  0  0999 V2000
   -1.4289    0.2062    0.0000 C   0  0  0  0  0  0  0  0  0  0  0  0
   -1.4289   -0.6188    0.0000 C   0  0  0  0  0  0  0  0  0  0  0  0
   -0.7145   -1.0313    0.0000 C   0  0  0  0  0  0  0  0  0  0  0  0
    0.0000   -0.6188    0.0000 C   0  0  0  0  0  0  0  0  0  0  0  0
    0.0000    0.2062    0.0000 C   0  0  0  0  0  0  0  0  0  0  0  0
   -0.7145    0.6188    0.0000 C   0  0  0  0  0  0  0  0  0  0  0  0
    0.7145    0.6188    0.0000 C   0  0  0  0  0  0  0  0  0  0  0  0
    1.4289    0.2062    0.0000 C   0  0  0  0  0  0  0  0  0  0  0  0
    2.1434    0.6188    0.0000 Cl  0  0  0  0  0  0  0  0  0  0  0  0
   -2.1434    0.6188    0.0000 C   0  0  0  0  0  0  0  0  0  0  0  0
    0.0000    1.0313    0.0000 C   0  0  0  0  0  0  0  0  0  0  0  0
   -2.1434   -1.0313    0.0000 Cl  0  0  0  0  0  0  0  0  0  0  0  0
    0.7145   -1.0313    0.0000 Cl  0  0  0  0  0  0  0  0  0  0  0  0
  1  2  1  0      
  2  3  1  0      
  3  4  1  0      
  4  5  1  0      
  5  6  1  0      
  6  1  1  0      
  5  7  1  0      
  7  8  2  0      
  8  9  1  0      
  1 10  2  0      
  5 11  1  1      
  2 12  1  1      
  4 13  1  6      
M  END
