# Supplementary material for: Site-Specific Variability in the Chemical Diversity of the Antarctic Red Alga Plocamium cartilagineum
Source: MDPI journal article supplement (doi:10.3390/md11062126), 2013-06-14
Supplement: s6 [file s6]

marinedrugs-11-02126-s003.mol
  corina  04141423423D 1   1.00000     0.00000 
CORINA 3.49 0023  12.04.2013
 15 14  0  0  0  0  0  0  0  0999 V2000
   -0.0187    1.5258    0.0104 C   0  0  0  0  0  0  0  0  0  0  0  0
    0.0021   -0.0041    0.0020 C   0  0  0  0  0  0  0  0  0  0  0  0
   -1.4117   -0.5257    0.0127 C   0  0  0  0  0  0  0  0  0  0  0  0
   -1.8205   -1.2899    0.9951 C   0  0  0  0  0  0  0  0  0  0  0  0
    1.8257    2.2063   -0.0035 Br  0  0  0  0  0  0  0  0  0  0  0  0
   -3.2343   -1.8115    1.0058 C   0  0  0  0  0  0  0  0  0  0  0  0
   -3.2143   -3.3368    1.1231 C   0  0  0  0  0  0  0  0  0  0  0  0
   -2.4721   -3.9213   -0.0510 C   0  0  0  0  0  0  0  0  0  0  0  0
   -1.3989   -4.6480    0.1476 C   0  0  0  0  0  0  0  0  0  0  0  0
   -0.4676   -5.3814   -1.3257 Br  0  0  0  0  0  0  0  0  0  0  0  0
   -4.6497   -3.8664    1.1340 C   0  0  0  0  0  0  0  0  0  0  0  0
   -2.3871   -3.8111    2.6534 Cl  0  0  0  0  0  0  0  0  0  0  0  0
   -4.0615   -1.3372   -0.5245 Cl  0  0  0  0  0  0  0  0  0  0  0  0
    0.8741   -0.6013    1.4627 Cl  0  0  0  0  0  0  0  0  0  0  0  0
    0.7182   -0.4975   -1.2568 C   0  0  0  0  0  0  0  0  0  0  0  0
  1  2  1  0      
  2  3  1  0      
  3  4  2  0      
  5  1  1  0      
  4  6  1  0      
  6  7  1  0      
  7  8  1  0      
  8  9  2  0      
  9 10  1  0      
  7 11  1  0      
  7 12  1  0      
  6 13  1  0      
  2 14  1  0      
  2 15  1  0      
M  END
$$$$
