# Supplementary material for: Site-Specific Variability in the Chemical Diversity of the Antarctic Red Alga Plocamium cartilagineum
Source: MDPI journal article supplement (doi:10.3390/md11062126), 2013-06-14
Supplement: s7 [file s7]

marinedrugs-11-02126-s003.mol
  ChemDraw02071408442D

 15 14  0  0  0  0  0  0  0  0999 V2000
   -2.1022    0.8250    0.0000 C   0  0  0  0  0  0  0  0  0  0  0  0
   -2.1022    0.0000    0.0000 C   0  0  0  0  0  0  0  0  0  0  0  0
   -1.3877   -0.4125    0.0000 C   0  0  0  0  0  0  0  0  0  0  0  0
   -0.6733    0.0000    0.0000 C   0  0  0  0  0  0  0  0  0  0  0  0
   -1.3877    1.2375    0.0000 Br  0  0  0  0  0  0  0  0  0  0  0  0
    0.0412   -0.4125    0.0000 C   0  0  0  0  0  0  0  0  0  0  0  0
    0.7557    0.0000    0.0000 C   0  0  0  0  0  0  0  0  0  0  0  0
    1.4702   -0.4125    0.0000 C   0  0  0  0  0  0  0  0  0  0  0  0
    2.1846    0.0000    0.0000 C   0  0  0  0  0  0  0  0  0  0  0  0
    2.8991   -0.4125    0.0000 Br  0  0  0  0  0  0  0  0  0  0  0  0
    0.3432    0.7145    0.0000 C   0  0  0  0  0  0  0  0  0  0  0  0
    1.1682    0.7145    0.0000 Cl  0  0  0  0  0  0  0  0  0  0  0  0
    0.0412   -1.2375    0.0000 Cl  0  0  0  0  0  0  0  0  0  0  0  0
   -2.5147   -0.7145    0.0000 Cl  0  0  0  0  0  0  0  0  0  0  0  0
   -2.8991   -0.2135    0.0000 C   0  0  0  0  0  0  0  0  0  0  0  0
  1  2  1  0      
  2  3  1  0      
  3  4  2  0      
  5  1  1  0      
  4  6  1  0      
  6  7  1  0      
  7  8  1  0      
  8  9  2  0      
  9 10  1  0      
  7 11  1  1      
  7 12  1  6      
  6 13  1  6      
  2 14  1  6      
  2 15  1  1      
M  END
