# Supplementary material for: Site-Specific Variability in the Chemical Diversity of the Antarctic Red Alga Plocamium cartilagineum
Source: Mar Drugs. 2013 Jun 14;11(6):2126–39. doi: 10.3390/md11062126 (PMC3721224; doi:10.3390/md11062126)
Supplement: Supplementary File 1 — Supplementary Information (PDF, 50 KB) [file marinedrugs-11-02126-s001.pdf]

## Supplementary Information

**Figure S1.** Percentage divergence among *P. cartilagineum* individuals based on *cox1* gene.

|                            | SANT-Algae-... | 1aCOX | 1Ccox | 2Acox | 2Bcox | 4Bcox | 6Ccox | 4Ccox | 4Acox | 2CcoxR-coxR | 3CcoxR-coxR | 5Ccox | 5Bcox | 1Bcox | 3AcoxR-coxR | 3Bcox | 6ACOX | 6Bcox | 7Acox | 7Bcox | 7Ccox | FlatPlo |
|----------------------------|----------------|-------|-------|-------|-------|-------|-------|-------|-------|-------------|-------------|-------|-------|-------|-------------|-------|-------|-------|-------|-------|-------|---------|
| SANT-Algae-24198JF271583.1 |                | 0.069 | 0.069 | 0.069 | 0.069 | 0.069 | 0.069 | 0.069 | 0.069 | 0.069       | 0.069       | 0.071 | 0.069 | 0.069 | 0.069       | 0.069 | 0.069 | 0.069 | 0.069 | 0.069 | 0.069 | 0.069   |
| 1aCOX                      | 0.069          |       | 0.000 | 0.000 | 0.000 | 0.000 | 0.000 | 0.000 | 0.000 | 0.000       | 0.021       | 0.021 | 0.019 | 0.019 | 0.019       | 0.019 | 0.019 | 0.019 | 0.019 | 0.019 | 0.019 | 0.019   |
| 1Ccox                      | 0.069          | 0.000 |       | 0.000 | 0.000 | 0.000 | 0.000 | 0.000 | 0.000 | 0.000       | 0.021       | 0.021 | 0.019 | 0.019 | 0.019       | 0.019 | 0.019 | 0.019 | 0.019 | 0.019 | 0.019 | 0.019   |
| 2Acox                      | 0.069          | 0.000 | 0.000 |       | 0.000 | 0.000 | 0.000 | 0.000 | 0.000 | 0.000       | 0.021       | 0.021 | 0.019 | 0.019 | 0.019       | 0.019 | 0.019 | 0.019 | 0.019 | 0.019 | 0.019 | 0.019   |
| 2Bcox                      | 0.069          | 0.000 | 0.000 | 0.000 |       | 0.000 | 0.000 | 0.000 | 0.000 | 0.000       | 0.021       | 0.021 | 0.019 | 0.019 | 0.019       | 0.019 | 0.019 | 0.019 | 0.019 | 0.019 | 0.019 | 0.019   |
| 4Bcox                      | 0.069          | 0.000 | 0.000 | 0.000 | 0.000 |       | 0.000 | 0.000 | 0.000 | 0.000       | 0.021       | 0.021 | 0.019 | 0.019 | 0.019       | 0.019 | 0.019 | 0.019 | 0.019 | 0.019 | 0.019 | 0.019   |
| 4Ccox                      | 0.069          | 0.000 | 0.000 | 0.000 | 0.000 | 0.000 |       | 0.000 | 0.000 | 0.000       | 0.021       | 0.021 | 0.019 | 0.019 | 0.019       | 0.019 | 0.019 | 0.019 | 0.019 | 0.019 | 0.019 | 0.019   |
| 4Acox                      | 0.069          | 0.000 | 0.000 | 0.000 | 0.000 | 0.000 | 0.000 |       | 0.000 | 0.000       | 0.021       | 0.021 | 0.019 | 0.019 | 0.019       | 0.019 | 0.019 | 0.019 | 0.019 | 0.019 | 0.019 | 0.019   |
| 2CcoxR-coxR                | 0.069          | 0.000 | 0.000 | 0.000 | 0.000 | 0.000 | 0.000 | 0.000 |       | 0.000       | 0.021       | 0.021 | 0.019 | 0.019 | 0.019       | 0.019 | 0.019 | 0.019 | 0.019 | 0.019 | 0.019 | 0.019   |
| 3CcoxR-coxR                | 0.069          | 0.021 | 0.021 | 0.021 | 0.021 | 0.021 | 0.021 | 0.021 | 0.021 | 0.021       |             | 0.004 | 0.002 | 0.002 | 0.002       | 0.002 | 0.002 | 0.002 | 0.002 | 0.002 | 0.002 | 0.002   |
| 5Ccox                      | 0.071          | 0.021 | 0.021 | 0.021 | 0.021 | 0.021 | 0.021 | 0.021 | 0.021 | 0.021       | 0.004       |       | 0.002 | 0.002 | 0.002       | 0.002 | 0.002 | 0.002 | 0.002 | 0.002 | 0.002 | 0.002   |
| 5Bcox                      | 0.069          | 0.019 | 0.019 | 0.019 | 0.019 | 0.019 | 0.019 | 0.019 | 0.019 | 0.019       | 0.002       | 0.002 |       | 0.000 | 0.000       | 0.000 | 0.000 | 0.000 | 0.000 | 0.000 | 0.000 | 0.000   |
| 1Bcox                      | 0.069          | 0.019 | 0.019 | 0.019 | 0.019 | 0.019 | 0.019 | 0.019 | 0.019 | 0.019       | 0.002       | 0.002 | 0.000 |       | 0.000       | 0.000 | 0.000 | 0.000 | 0.000 | 0.000 | 0.000 | 0.000   |
| 3AcoxR-coxR                | 0.069          | 0.019 | 0.019 | 0.019 | 0.019 | 0.019 | 0.019 | 0.019 | 0.019 | 0.019       | 0.002       | 0.002 | 0.000 | 0.000 |             | 0.000 | 0.000 | 0.000 | 0.000 | 0.000 | 0.000 | 0.000   |
| 3Bcox                      | 0.069          | 0.019 | 0.019 | 0.019 | 0.019 | 0.019 | 0.019 | 0.019 | 0.019 | 0.019       | 0.002       | 0.002 | 0.000 | 0.000 | 0.000       |       | 0.000 | 0.000 | 0.000 | 0.000 | 0.000 | 0.000   |
| 6ACOX                      | 0.069          | 0.019 | 0.019 | 0.019 | 0.019 | 0.019 | 0.019 | 0.019 | 0.019 | 0.019       | 0.002       | 0.002 | 0.000 | 0.000 | 0.000       | 0.000 |       | 0.000 | 0.000 | 0.000 | 0.000 | 0.000   |
| 6Bcox                      | 0.069          | 0.019 | 0.019 | 0.019 | 0.019 | 0.019 | 0.019 | 0.019 | 0.019 | 0.019       | 0.002       | 0.002 | 0.000 | 0.000 | 0.000       | 0.000 | 0.000 |       | 0.000 | 0.000 | 0.000 | 0.000   |
| 7Acox                      | 0.069          | 0.019 | 0.019 | 0.019 | 0.019 | 0.019 | 0.019 | 0.019 | 0.019 | 0.019       | 0.002       | 0.002 | 0.000 | 0.000 | 0.000       | 0.000 | 0.000 | 0.000 |       | 0.000 | 0.000 | 0.000   |
| 7Bcox                      | 0.069          | 0.019 | 0.019 | 0.019 | 0.019 | 0.019 | 0.019 | 0.019 | 0.019 | 0.019       | 0.002       | 0.002 | 0.000 | 0.000 | 0.000       | 0.000 | 0.000 | 0.000 | 0.000 |       | 0.000 | 0.000   |
| 7Ccox                      | 0.069          | 0.019 | 0.019 | 0.019 | 0.019 | 0.019 | 0.019 | 0.019 | 0.019 | 0.019       | 0.002       | 0.002 | 0.000 | 0.000 | 0.000       | 0.000 | 0.000 | 0.000 | 0.000 | 0.000 |       | 0.000   |
| FlatPlo                    | 0.069          | 0.019 | 0.019 | 0.019 | 0.019 | 0.019 | 0.019 | 0.019 | 0.019 | 0.019       | 0.002       | 0.002 | 0.000 | 0.000 | 0.000       | 0.000 | 0.000 | 0.000 | 0.000 | 0.000 | 0.000 |         |

**Figure S2.** Percentage divergence among *P. cartilagineum* individuals based on *rbcL* gene.

|                | 2Arbcl | 1Arbcl | 2Brbcl | 2Crbcl | 4Arbcl | 6Arbcl | 6C2rbcl | 4Brbcl | ncb961528(K... | 1Brbcl | 3Brbcl | 3Crbcl | 5Arbcl | 7Arbcl | Flatrbcl | 7CPlorbcl | 3Arbcl | 5Brbcl | 5Crbcl | 7Brbcl |
|----------------|--------|--------|--------|--------|--------|--------|---------|--------|----------------|--------|--------|--------|--------|--------|----------|-----------|--------|--------|--------|--------|
| 2Arbcl         |        | 0.003  | 0.003  | 0.005  | 0.003  | 0.003  | 0.003   | 0.004  | 0.011          | 0.007  | 0.008  | 0.007  | 0.008  | 0.007  | 0.007    | 0.007     | 0.007  | 0.007  | 0.007  | 0.008  |
| 1Arbcl         | 0.003  |        | 0.000  | 0.001  | 0.000  | 0.000  | 0.000   | 0.000  | 0.008          | 0.003  | 0.005  | 0.003  | 0.005  | 0.003  | 0.003    | 0.003     | 0.003  | 0.003  | 0.003  | 0.003  |
| 2Brbcl         | 0.003  | 0.000  |        | 0.001  | 0.000  | 0.000  | 0.000   | 0.000  | 0.008          | 0.003  | 0.005  | 0.003  | 0.005  | 0.003  | 0.003    | 0.003     | 0.003  | 0.003  | 0.003  | 0.003  |
| 2Crbcl         | 0.005  | 0.001  | 0.001  |        | 0.001  | 0.000  | 0.001   | 0.000  | 0.009          | 0.005  | 0.006  | 0.005  | 0.006  | 0.005  | 0.005    | 0.005     | 0.005  | 0.005  | 0.005  | 0.003  |
| 4Arbcl         | 0.003  | 0.000  | 0.000  | 0.001  |        | 0.000  | 0.000   | 0.000  | 0.008          | 0.003  | 0.005  | 0.003  | 0.005  | 0.003  | 0.003    | 0.003     | 0.003  | 0.003  | 0.003  | 0.003  |
| 6Arbcl         | 0.003  | 0.000  | 0.000  | 0.000  | 0.000  |        | 0.000   | 0.000  | 0.008          | 0.003  | 0.005  | 0.003  | 0.005  | 0.003  | 0.003    | 0.003     | 0.003  | 0.003  | 0.003  | 0.003  |
| 6C2rbcl        | 0.003  | 0.000  | 0.000  | 0.001  | 0.000  | 0.000  |         | 0.000  | 0.008          | 0.003  | 0.005  | 0.003  | 0.005  | 0.003  | 0.003    | 0.003     | 0.003  | 0.003  | 0.003  | 0.003  |
| 4Brbcl         | 0.004  | 0.000  | 0.000  | 0.000  | 0.000  | 0.000  | 0.000   |        | 0.005          | 0.003  | 0.003  | 0.003  | 0.003  | 0.003  | 0.003    | 0.003     | 0.003  | 0.003  | 0.003  | 0.003  |
| ncb961528(KG1) | 0.011  | 0.008  | 0.008  | 0.009  | 0.008  | 0.008  | 0.008   | 0.005  |                | 0.005  | 0.006  | 0.005  | 0.006  | 0.005  | 0.005    | 0.005     | 0.005  | 0.005  | 0.005  | 0.002  |
| 1Brbcl         | 0.007  | 0.003  | 0.003  | 0.005  | 0.003  | 0.003  | 0.003   | 0.003  | 0.005          |        | 0.001  | 0.000  | 0.001  | 0.000  | 0.000    | 0.000     | 0.000  | 0.000  | 0.000  | 0.000  |
| 3Brbcl         | 0.008  | 0.005  | 0.005  | 0.006  | 0.005  | 0.005  | 0.005   | 0.003  | 0.006          | 0.001  |        | 0.001  | 0.002  | 0.001  | 0.001    | 0.001     | 0.001  | 0.001  | 0.001  | 0.000  |
| 3Crbcl         | 0.007  | 0.003  | 0.003  | 0.005  | 0.003  | 0.003  | 0.003   | 0.003  | 0.005          | 0.000  | 0.001  |        | 0.001  | 0.000  | 0.000    | 0.000     | 0.000  | 0.000  | 0.000  | 0.000  |
| 5Arbcl         | 0.008  | 0.005  | 0.005  | 0.006  | 0.005  | 0.005  | 0.005   | 0.003  | 0.006          | 0.001  | 0.002  | 0.001  |        | 0.001  | 0.001    | 0.001     | 0.001  | 0.001  | 0.001  | 0.000  |
| 7Arbcl         | 0.007  | 0.003  | 0.003  | 0.005  | 0.003  | 0.003  | 0.003   | 0.003  | 0.005          | 0.000  | 0.001  | 0.000  | 0.001  |        | 0.000    | 0.000     | 0.000  | 0.000  | 0.000  | 0.000  |
| Flatrbcl       | 0.007  | 0.003  | 0.003  | 0.005  | 0.003  | 0.003  | 0.003   | 0.003  | 0.005          | 0.000  | 0.001  | 0.000  | 0.001  | 0.000  |          | 0.000     | 0.000  | 0.000  | 0.000  | 0.000  |
| 7CPlorbcl      | 0.007  | 0.003  | 0.003  | 0.005  | 0.003  | 0.003  | 0.003   | 0.003  | 0.005          | 0.000  | 0.001  | 0.000  | 0.001  | 0.000  | 0.000    |           | 0.000  | 0.000  | 0.000  | 0.000  |
| 3Arbcl         | 0.007  | 0.003  | 0.003  | 0.005  | 0.003  | 0.003  | 0.003   | 0.003  | 0.005          | 0.000  | 0.001  | 0.000  | 0.001  | 0.000  | 0.000    | 0.000     |        | 0.000  | 0.000  | 0.000  |
| 5Brbcl         | 0.007  | 0.003  | 0.003  | 0.005  | 0.003  | 0.003  | 0.003   | 0.003  | 0.005          | 0.000  | 0.001  | 0.000  | 0.001  | 0.000  | 0.000    | 0.000     | 0.000  |        | 0.000  | 0.000  |
| 5Crbcl         | 0.007  | 0.003  | 0.003  | 0.005  | 0.003  | 0.003  | 0.003   | 0.003  | 0.005          | 0.000  | 0.001  | 0.000  | 0.001  | 0.000  | 0.000    | 0.000     | 0.000  | 0.000  |        | 0.000  |
| 7Brbcl         | 0.008  | 0.003  | 0.003  | 0.003  | 0.003  | 0.003  | 0.003   | 0.003  | 0.002          | 0.000  | 0.000  | 0.000  | 0.000  | 0.000  | 0.000    | 0.000     | 0.000  | 0.000  | 0.000  |        |
